# Supplementary material
Source: PubMed Central journal article supplement (PMC6520982)
Supplement: NIHMS1024416-supplement-1.pdf [file NIHMS1024416-supplement-1.pdf]

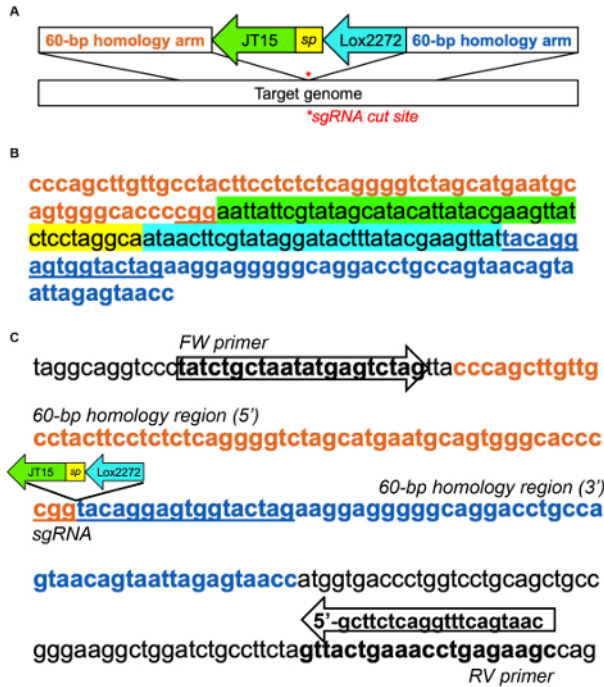

**Supplementary Figure 1: Example of landing pad insertion into murine *Dnmt1* intron 1. (A)** Schematic of DNA template for landing pad insertion, adapted from Quadros et al. (2015)<sup>31</sup>. Heterotypic *loxP* sites, JT15 and Lox2272, are separated by a short spacer sequence (*sp*) and flanked on each side by 60-bp of DNA that is homologous to the target genomic region. **(B)** Sample DNA template for landing pad insertion into the *Dnmt1* intron using the following sgRNA: CTAGTACCACTCCTGTACCG (which targets the reverse strand). The selected intronic region was bioinformatically informed by step 1.1, and the sgRNA was identified using CRISPOR<sup>29</sup>. **(C)** Example of PCR primer design for assessing insertion of the landing pad. PCR primers were designed outside of the homology arms of the template to confirm integration into endogenous *Dnmt1*. The wildtype PCR amplicon is 213 bp; upon insertion, it becomes 291 bp. [Please click here to view a larger version of this figure.](#)
